# Supplementary material
Source: MDPI journal article supplement (https://www.mdpi.com/2038-8330/15/1/13)
Supplement: s1 [file s1]

Table S1: Laboratory parameters of SLU- and SLU+ patients according to  $\alpha$ -3.7Kb thalassemia.

|                                | $\alpha\alpha/\alpha\alpha$ , n = 52 |                 |                | $-\alpha/\alpha\alpha$ and $-\alpha/-\alpha$ , n = 15 |                 |                |
|--------------------------------|--------------------------------------|-----------------|----------------|-------------------------------------------------------|-----------------|----------------|
| Hematological biomarkers       | SLU- (n=39)                          | SLU+ (n=13)     | <i>P-value</i> | SLU- (n=12)                                           | SLU+ (n=3)      | <i>P-value</i> |
| RBC, $\times 10^6/\mu\text{L}$ | 3.79 $\pm$ 1.03                      | 2.66 $\pm$ 1.05 | <b>0.002*</b>  | 3.04 $\pm$ 1.07                                       | 2.39 $\pm$ 0.36 | <b>0.043*</b>  |
| Hemoglobin, g/dL               | 11.0 $\pm$ 2.85                      | 9.35 $\pm$ 2.64 | <b>0.049*</b>  | 10.3 $\pm$ 1.49                                       | 7.80 $\pm$ 1.80 | <b>0.036*</b>  |
| Hematocrit, %                  | 33.9 $\pm$ 7.46                      | 28.1 $\pm$ 7.79 | <b>0.021*</b>  | 32.1 $\pm$ 5.11                                       | 24.0 $\pm$ 5.32 | <b>0.034*</b>  |
| MCV, fL                        | 92.3 $\pm$ 14.4                      | 110 $\pm$ 17.0  | <b>0.001</b>   | 91.4 $\pm$ 10.9                                       | 113 $\pm$ 5.51  | <b>0.022*</b>  |
| MCH, pg                        | 30.5 $\pm$ 4.98                      | 36.5 $\pm$ 5.67 | <b>0.001</b>   | 30.1 $\pm$ 3.75                                       | 36.9 $\pm$ 1.55 | <b>0.022*</b>  |
| MCHC, g/dL                     | 33.0 $\pm$ 1.00                      | 33.2 $\pm$ 0.78 | 0.655          | 33.2 $\pm$ 0.41                                       | 32.4 $\pm$ 0.35 | <b>0.031*</b>  |
| RDW, %                         | 17.3 $\pm$ 2.85                      | 17.0 $\pm$ 3.19 | 0.750          | 18.3 $\pm$ 2.51                                       | 18.5 $\pm$ 3.21 | 0.908          |
| Hemolytic biomarkers           |                                      |                 |                |                                                       |                 |                |
| LDH, U/L                       | 544 $\pm$ 280                        | 784 $\pm$ 387   | <b>0.025</b>   | 518 $\pm$ 143                                         | 813 $\pm$ 277   | <b>0.046</b>   |
| Total bilirubin, mg/dL         | 1.30 $\pm$ 1.16                      | 2.88 $\pm$ 2.27 | <b>0.039</b>   | 1.63 $\pm$ 0.83                                       | 3.60 $\pm$ 2.15 | <b>0.028</b>   |
| Direct bilirubin, mg/dL        | 0.25 $\pm$ 0.30                      | 0.33 $\pm$ 0.18 | 0.388          | 0.27 $\pm$ 0.09                                       | 0.30 $\pm$ 0.10 | 0.742          |
| Indirect bilirubin, mg/dL      | 1.05 $\pm$ 0.96                      | 2.55 $\pm$ 2.24 | <b>0.045</b>   | 1.33 $\pm$ 0.79                                       | 3.30 $\pm$ 2.10 | <b>0.024</b>   |
| AST, U/L                       | 27.4 $\pm$ 17.4                      | 53.9 $\pm$ 35.1 | <b>0.026</b>   | 35.1 $\pm$ 19.5                                       | 95.0 $\pm$ 74.9 | <b>0.035</b>   |
| GGT, U/L                       | 43.8 $\pm$ 27.3                      | 84.3 $\pm$ 63.5 | <b>0.019*</b>  | 38.7 $\pm$ 21.5                                       | 100 $\pm$ 93.3  | 0.064          |
| Uric acid, mg/dL               | 5.38 $\pm$ 1.88                      | 6.62 $\pm$ 2.84 | 0.092          | 4.79 $\pm$ 1.79                                       | 6.45 $\pm$ 2.19 | 0.252*         |
| Iron, mcg/dL                   | 97.5 $\pm$ 38.7                      | 138 $\pm$ 46.8  | <b>0.005*</b>  | 121 $\pm$ 52.7                                        | 265 $\pm$ 82.0  | <b>0.005</b>   |
| Ferritin, ng/mL                | 319 $\pm$ 337                        | 298 $\pm$ 289   | 0.842          | 311 $\pm$ 222                                         | 296 $\pm$ 392   | 0.936          |
| Nitric oxide metabolism        |                                      |                 |                |                                                       |                 |                |
| NOM, $\mu\text{M}$             | 49.2 $\pm$ 20.4                      | 52.2 $\pm$ 23.5 | 0.762*         | 46.2 $\pm$ 20.1                                       | 27.6 $\pm$ 3.16 | 0.070*         |

SLU-, patients without sickle leg ulcers; SLU+, patients with active sickle leg ulcers or previous history; RBC, red blood cell; MCV, mean cell volume; MCH, mean corpuscular hemoglobin; MCHC, mean corpuscular hemoglobin concentration; RDW, red cell distribution width; LDH, lactate dehydrogenase; AST, aspartate aminotransferase; GGT, gamma-glutamyl transferase; NOM, nitric oxide metabolites. *P*-value obtained using independent t-test. \**P*-value obtained using Mann-Whitney *U* test. Bold values indicate significance at *P* < 0.05.
